1 Quantitative genetic architecture of adaptive  
2 phenology traits in the deciduous tree, *Populus*  
3 *trichocarpa* (Torr. & Gray).

4  
5 Thomas J Richards<sup>1,\*</sup>, Almir Karacic<sup>2</sup>, Rami-Petteri Apuli<sup>1</sup>, Martin Weih<sup>2</sup>, Pär K.  
6 Ingvarsson<sup>1</sup> and Ann Christin Rönnberg-Wästljung<sup>1</sup>

7  
8 <sup>1</sup> Department of Plant Biology, Swedish University of Agricultural Sciences, Uppsala  
9 BioCentrum, Linnean Centre for Plant Biology, P.O. Box 7080, SE-750 07, Uppsala,  
10 Sweden

11 <sup>2</sup> Department of Crop Production Ecology, Swedish University of Agricultural  
12 Sciences, Uppsala Linnean Centre for Plant Biology, P.O. Box 7043, 750 07 Uppsala

13 \* Current address: Plant Ecology and Evolution, Department of Ecology and  
14 Genetics, EBC, Uppsala University SE-752 36, Uppsala, Sweden  
15 [thomas.richards@ebc.uu.se](mailto:thomas.richards@ebc.uu.se)

16 +46765503545

17  
18 Word count:

19 Abstract: 232

20 Body: 4167

## 21 ABSTRACT

22

23 In a warming climate, the ability to accurately predict and track shifting  
 24 environmental conditions will be fundamental for plant survival. Environmental  
 25 cues define the transitions between growth and dormancy as plants synchronise  
 26 development with favourable environmental conditions, however these cues are  
 27 predicted to change under future climate projections which may have profound  
 28 impacts on tree survival and growth. Here, we use a quantitative genetic approach to  
 29 estimate the genetic basis of spring and autumn phenology in *Populus trichocarpa* to  
 30 determine this species capacity for climate adaptation. We measured bud burst, leaf  
 31 coloration, and leaf senescence traits across two years (2017- 2018) and combine  
 32 these observations with measures of lifetime growth to determine how genetic  
 33 correlations between phenology and growth may facilitate or constrain adaptation.  
 34 Timing of transitions differed between years, although we found strong cross year  
 35 genetic correlations in all traits, suggesting that genotypes respond in consistent ways  
 36 to seasonal cues. Spring and autumn phenology were correlated with lifetime growth,  
 37 where genotypes that burst leaves early and shed them late had the highest lifetime  
 38 growth. We also identified substantial heritable variation in the timing of all  
 39 phenological transitions ( $h^2 = 0.5-0.8$ ) and in lifetime growth ( $h^2 = 0.8$ ). The  
 40 combination of abundant additive variation and favourable genetic correlations in  
 41 phenology traits suggests that cultivated varieties of *P. trichocarpa* have the  
 42 capability to create populations which may adapt their phenology to climatic changes  
 43 without negative impacts on growth.

44

## 45 INTRODUCTION

46

47 Perennial plants transition between periods of growth and dormancy in response to  
 48 seasonal changes. Patterns of growth cessation and dormancy minimise the risk of  
 49 tissue damage from freezing over winter and are primarily induced by a change in  
 50 photoperiod (FRACHEBOUD *et al.* 2009; BASLER AND KÖRNER 2012). Once dormant,  
 51 many plants require a period of chilling before active growth is resumed in response

52 to warming spring temperatures (HORVATH *et al.* 2003). These transitions define the  
 53 trade-off between growth and potential damage and are therefore expected to be  
 54 subject to natural selection. Widespread species are exposed to a range of temperature  
 55 and photoperiod length across their distribution, leading many species to show local  
 56 adaptation and heritable variation in the timing of these phenology transitions  
 57 associated with local conditions (HOWE *et al.* 2003; LUQUEZ *et al.* 2008; CONG *et al.*  
 58 2016). The adaptive significance of cyclic phenology is especially important in  
 59 woody perennials such as trees, as they are long lived and therefore exposed to  
 60 seasonal changes over multiple years.

61  
 62 While both spring and autumn phenology determine growing season and are therefore  
 63 potentially adaptive, transitions are determined by different cues and therefore may  
 64 respond to selection in different ways (SINGH *et al.* 2017). Dormancy is broken by  
 65 changes in temperature at the beginning of spring in many plants (MCKOWN *et al.*  
 66 2018), and therefore bud burst is defined by cues which have significant variation  
 67 between local environments and successive years (BASLER AND KÖRNER 2012;  
 68 BRELSFORD *et al.* 2019). Growth cessation is generally induced by changes in  
 69 photoperiod (FRACHEBOUD *et al.* 2009; LAGERCRANTZ 2009; MICHELSON *et al.* 2017)  
 70 or associated changes in the light spectrum (LEUCHNER *et al.* 2007; BRELSFORD *et al.*  
 71 2019), and therefore varies predictably with latitude and consistently between  
 72 growing seasons. These different characteristics between the triggers of growth and  
 73 dormancy mean that the adaptation toward the optimal conditions and timing for  
 74 spring and autumn phenology requires different biological responses. Consequently,  
 75 effects of natural selection on genetic variation in these traits is likely to differ,  
 76 potentially driving differences in the genetic architecture underlying each trait and  
 77 influencing the scope of adaptive shifts in phenology traits under novel climatic  
 78 conditions.

79  
 80 Phenotypic variation is well characterised for many physiological and phenological  
 81 traits in deciduous trees (COSTA E SILVA *et al.* 2004; FABBRINI *et al.* 2012), foremost  
 82 of which are the Poplars, due to their adaptability, widespread distribution and

commercial value. A number of studies have investigated the genetic basis of poplar phenotypes and have identified many genomic variants associated with phenology and growth (INGVARSSON *et al.* 2008; LUQUEZ *et al.* 2008; FABBRINI *et al.* 2012; TRIOZZI *et al.* 2018). However, adaptability in complex traits largely depends on the pleiotropic effects of this genetic variation which can manifest as genetic covariance between phenology and growth-related traits (PORTH *et al.* 2014; MCKOWN *et al.* 2018). This information is fundamental to understanding the adaptability of poplar species, as the degree of genetic covariance between phenology traits and growth ultimately determines the magnitude of response to selection on individual traits (PORTH *et al.* 2015). A life history strategy that minimises the risk of cold damage through late bud burst and early bud set may reduce the overall growth and therefore constrain growth and establishment. Similarly, a strategy of early bud burst and late bud set results in a long growing season but increases the risk of frost related injury. As such, the capacity of trees to adapt to climatic variation is dependent on the genetic variance and covariance of phenology traits and growth, which determines the current range limit (CHUINE 2010) and potential to expand into novel habitats (ZANEWICH *et al.* 2018).

100

*Populus trichocarpa* (black cottonwood) is one of several large, deciduous, tree species within the genus *Populus*. *Populus* species are generally fast-growing and as such have great ecological significance as pioneer species (CRONK 2005), as well as an increasing value as a species for short rotation forestry (WEIH 2004) and bioenergy production (SANNIGRAHI *et al.* 2010; PORTH AND EL-KASSABY 2015). As a result, there has been extensive development of genetic resources to investigate and capitalise on the genetic basis of adaptation and growth traits in these species (CRONK 2005; JANSSON AND DOUGLAS 2007). Extensive research has identified substantial genetic variation across several adaptive traits, and while these estimates derive from a range of experimental designs and study populations, moderate to high heritability has been generally reported for growth (BRADSHAW AND STETTLER 1995; YU *et al.* 2001; PORTH *et al.* 2015), leaf phenology (HOWE *et al.* 2000; MCKOWN *et al.* 2014a; PORTH *et al.* 2015) and cold tolerance (HOWE *et al.* 2003) traits. A distribution over a

114 wide range of geography and climate has driven patterns of local adaptation (EVANS  
115 *et al.* 2014; MCKOWN *et al.* 2014a), however extensive long distance pollen transfer  
116 and large population sizes have resulted in very low population differentiation across  
117 its natural range (SLAVOV AND ZHELEV 2010). Despite this, long running breeding  
118 programs have produced few varieties that are well suited to the photoperiod and  
119 climate typical of higher latitudes (KARACIC *et al.* 2003) which may limit  
120 establishment of populations outside of the natural climatic range.

121

122 Here, we analyse phenotypic variation in a clonally replicated population of *P.*  
123 *trichocarpa* genotypes grown in central Sweden. We survey the genetic basis of  
124 spring and autumn phenology and determine the genetic covariance of these traits  
125 with fitness in the form of lifetime growth. These relationships determine the genetic  
126 constraints on adaptive evolution in this species and as such may constrain range  
127 expansion into hostile environmental conditions. Specifically, we 1) aim to  
128 characterise heritable genetic variation for phenology traits in this population, and 2)  
129 test whether genetic correlations that exist between phenology traits may facilitate or  
130 constrain adaptation to novel climatic conditions.

131

## 132 MATERIALS & METHODS

133

### 134- *POPULATION CHARACTERISTICS AND PHENOTYPIC MEASUREMENTS.*

135 Here we present a quantitative genetics analysis of phenology measurements taken  
136 from 564 mature *P. trichocarpa* trees in a plantation at Krusenberg (59°44'44.2"N  
137 17°40'31.5"E) in central Sweden. Material in this plantation was originally generated  
138 from 9 female and 10 male trees collected over a latitudinal range from 44-60° in  
139 North America (Supplementary Table 1), which were randomly crossed to produce  
140 34 families. From these families, a total of 120 half sib, full sib, and unrelated trees  
141 (onward referred to as genotypes) were clonally replicated with between 1 and 20  
142 (median = 6) individual trees per genotype represented in the study population. The  
143 plantation was established in 2003 on a flat, homogeneous area of agricultural field  
144 approximately 275m x 40m. Individuals were planted at 3.5 m quadratic spacing in a

145 randomized design. The experiment was systematically thinned in March 2013  
146 leaving 564 trees in an approximately 3,5x7 m diamond spacing.

147

148 To assess variation in phenology we included the traits that best define the major  
149 milestones of phenology during the annual growth cycle. For spring development,  
150 bud burst (bb) was scored on a scale from 1-5, with stage bb2 representing initial  
151 shoot emergence, bb3 leaf primordia exposed, bb4 leaves half shed with bud scales  
152 dropped and bb5 leaves completely shed. Autumn phenology was scored on a scale of  
153 1-8 based on a continuous range of crown colouring from col1= 100% green, to col8  
154 100% yellow. Leaf senescence (ls) was measured on a 3-point scale where ls1 = full  
155 foliage, ls2 = half leaves remaining and stage ls3 full defoliated. We estimated  
156 growing season length by the duration of photosynthetically active leaf canopy.  
157 Canopy duration (CD) was defined as the period between the beginning of budburst  
158 (bb2) and beginning of leaf yellowing (co3). Phenology measurements were taken  
159 every 2-5 days during the spring and autumn seasons in 2017 and 2018. Lifetime  
160 growth was determined by measuring diameter at breast height (DBH) in 2017

161

162 While late season growth cessation is best described by bud set, this trait is difficult  
163 to accurately measure in mature trees. Due to the difficulty of determining the exact  
164 transitions between beginning of growth, cessation of growth and bud development in  
165 grown trees, we split these seasonal transitions into 5 biologically relevant proxy  
166 stages which describe the start and end of seasonal transition; bb2, the first bud  
167 emergence, (bb5) full leaf emergence, (col2) first stage of yellowing, (col5) complete  
168 yellowing, (ls3) day of full leaf shed. These phenology traits are combined with  
169 growth of the tree at 14 years of age as measured by cross calliper measurement  
170 (DBH) in 2017.

171

## 172 *DATA IMPUTATION*

173 Screening was conducted at intervals of 2-5 days meaning that individual trees  
174 occasionally passed through developmental stages between screenings. To account  
175 for these missing estimates of the day of transition we estimated the transition days

for each developmental stage using local regression models (LOESS) fit to each individual tree. Models were fit through the data point of the first day an individual tree was observed at a stage transition and day estimates were calculated for any stage transitions for which there was no direct observation (Figure S2). This method estimates a non-linear developmental curve which is not constrained to fit any a-priori mathematic distribution for each individual tree and allows estimation of the day in which trees passed each developmental stage and inclusion of individuals which were not observed at important developmental transitions in the analysis. As extrapolation beyond the range of the observed data is unreliable using this method, we only retained estimates that were bounded by observations on either side. We validated this method by comparing estimated values with direct observations to ensure that estimated transitions accurately represented the observed data (Pearsons R = 0.98-1).

189

## 190 STATISTICAL ANALYSIS

### 191 *Heritability and cross year genetic correlations*

192

We estimated genetic parameters in this population using Bayesian Mixed model approach implemented in the MCMCglmm R package (HADFIELD 2010). This approach uses pedigree information to construct a relatedness (A) matrix which allows for a proper structuring of the random genetic effects to account for the complex combination of unrelated individuals, with half and full sibs included in the plantation. To estimate additive genetic heritability ( $h^2$ ) for each genotype, and to determine the additive genetic co-variance between measurement years, we implemented the following bivariate models, where measures of each transition trait (e.g., budburst) taken in subsequent years 2017 ( $Y1$ ) and 2018 ( $Y2$ ) formed a bivariate response variable,  $\mu$  is a fixed intercept,  $g$  is the random additive genetic component drawn from pedigree information and  $\varepsilon_{ijk}$  residual variance.

204

$$(Y1, Y2)_{ij} = \mu + g_i + \varepsilon_{ij} \quad (1)$$

205

206 Following the approach of KENNEDY AND SCHAEFFER (1989), we treat genetically  
 207 identical individual trees (clones) from the same genotype as repeated measures, and  
 208 estimate the genetic parameters based on the definition of the relatedness matrix (A)  
 209 among genotypes rather than cloned individuals. Variation between individual trees  
 210 within genotype was partitioned into the residual variance. Each trait was modelled  
 211 separately. Models were run for 1000000 iterations, and we implemented Markov  
 212 chain Monte-Carlo sampling with a thinning interval of 1000 to ensure very low  
 213 autocorrelation between samples ( $> 0.003$ ), and burn-in period of 1000 iterations.  
 214 This approach yielded posterior probability distributions with sample sizes for each  
 215 trait pair near 1000, from which we derived parameter estimates with 95% credible  
 216 intervals. In all cases we specified uninformative priors (variance = 1, degree of belief  
 217 = 0.002), although we also ran models with a range of prior specifications to ensure  
 218 the final parameter estimates were not affected by our chosen priors. We extracted  
 219 estimates for genetic effects from the posterior distribution of model (1) and  
 220 calculated narrow sense heritability by extracting the additive genetic ( $V_a$ ) proportion  
 221 of total trait variance ( $V_a + V_e$ ). Note that we estimate heritability based on each  
 222 genotype, with variance among individual trees within genotype partitioned in the  
 223 residual term.:

224

$$h^2 = \frac{V_a}{V_a + V_e}$$

225 Separate heritability estimates were calculated for each phenology trait in two  
 226 consecutive seasons (2017 and 2018). We do not directly account for dominance  
 227 effects in this model due to limited size and depth in the pedigree, and as such our  
 228 estimates of heritability may be overestimated as some portion of any potential  
 229 dominance variance may contribute to the estimates of  $V_a$  (WALSH AND LYNCH 2018).  
 230 Cross-year genetic correlations were calculated by extracting the 2x2 genetic  
 231 variance-(co)variance matrix from model (1), and we calculated genetic correlations  
 232 as the genetic covariance between traits divided by the square root of the product of  
 233 the variances.

234



## 235 GENETIC CORRELATIONS OF SPRING AND AUTUMN PHENOLOGY

236 We calculated the additive genetic correlations between phenology transitions and  
 237 lifetime growth to determine the genetic architecture relating phenology to fitness.  
 238 We combined the phenology transitions of budburst (bb2), leaf expansion (bb5), start  
 239 of leaf yellowing (col2), end of leaf yellowing, (col5) leaf shed (ls3), canopy duration  
 240 (CD) and lifetime growth (DBH) as a 7-trait multivariate response ( $Y_{ijk}$ ), and  
 241 implemented the following model:

242

$$Y_{ijk} = \mu + T_i + g_j + \varepsilon_{ijk}$$

243

244 Where  $\mu$  is a fixed intercept,  $T_i$  is the fixed effect of year,  $g_j$  is the random term  
 245 describing the additive genetic variance drawn from pedigree information and  $\varepsilon_{ijk}$   
 246 residual variance. We implemented this model using a Bayesian ‘animal’ model  
 247 approach in the MCMCGLMM package in R (HADFIELD 2010). We implemented  
 248 Markov Chain Monte Carlo sampling to estimate posterior probability distributions  
 249 for the genetic parameters, and increased iterations until sample sizes for each  
 250 estimation approached 1000. Our final models included 500,000 iterations, with a  
 251 thinning interval of 500 and a burn-in of 10,000 iterations. Priors were constructed  
 252 using measured phenotypic variances with a low degree of belief, and were checked  
 253 against uninformative priors with low and high degrees of belief to ensure that prior  
 254 specification had little effect on parameter estimates.

255

256 We extracted the 7x7 genetic variance-(co)variance matrix from this model, and  
 257 calculated genetic correlations as the genetic covariance between traits divided by the  
 258 square root of the product of the variances. We extract the genetic correlation  
 259 between the 6 phenology traits and fitness (measured as DBH17, or lifetime growth)  
 260 to determine the genetic relationship between phenology and growth. This correlation  
 261 between phenology and growth ultimately determines whether adaptive shifts in  
 262 phenology in response to climate change will be associated with increased growth, or  
 263 be constrained by associated negative effects on tree growth.

264

265

## 266 RESULTS

267

### 268 *Phenotypic distribution, summary statistics*

269 All phenology transitions occurred earlier in 2018 than 2017 (Figure 1). Differences  
 270 in the mean date for each stage were between 3 days (leaf shed, bud burst) and almost  
 271 10 days (full yellow) earlier in 2018. Spring transitions occurred faster in 2018; bb2  
 272 occurred over a period of 39 days in 2017 and 17 days in 2018 (difference of 22  
 273 days), while leaf out (bb4) took 17 days in 2017 and 8 in 2018 (difference of 9 days).  
 274 These differences corresponded with temperature and rainfall variation between  
 275 observation years, where temperature increase was more gradual during spring in  
 276 2017, summer was warmer and wetter in 2018, and autumn was drier in 2018.  
 277 The duration of spring transitions was also shorter in 2018 indicating the abrupt  
 278 increase in spring temperature during that year sped up leaf unfurling.  
 279 (Figure S1).

280

### 281 *Trait heritability*

282 All phenology traits had moderate to high heritability with median estimates in the  
 283 range of 0.41-0.76, identifying significant genetic variation in phenology traits  
 284 between the genotypes in this growth trial (Figure 2). Heritability was highest in  
 285 budburst (2017), leaf shed (2017, 2018) and lifetime growth traits, and lowest for leaf  
 286 out and colouration transitions. Estimates for 2018 are reduced across all traits except  
 287 leaf shed, although there is considerable overlap in posterior distributions for  
 288 estimates in all traits except budburst.

289

290 Phenology traits had a strong genetic basis, with spring heritability in the range of  
 291 0.48 - 0.72 (bb2) and 0.51 - 0.62 (bb4) respectively. Autumn phenology was also  
 292 highly heritable, with highest and most consistent estimates for leaf shed (ls3) ( $h^2 =$   
 293 0.60 – 0.64). Lifetime growth was the highest and most precise of the heritability  
 294 estimates ( $h^2=0.76$ ), which reflects a substantial genetic basis for differences in  
 295 lifetime growth between genotypes.

296

### 297 *Cross year genetic correlations*

298 Despite the considerable interannual shifts in phenotypic means described above,  
 299 cross year genetic correlations were high. Estimates for budburst (bb2), onset of  
 300 colour change (col3), and leaf shed (ls3) all overlap 1, showing complete correlation  
 301 between years. The contribution of genetic variation to leaf out (bb5) and canopy  
 302 duration also very consistent with correlations above  $R = 0.8$ . The transition to full  
 303 yellow leaves cross-year correlation was  $R = 0.6$ , which is high given that this trait  
 304 also had the largest mean difference between years at 9.7 days.

305

### 306 *Additive genetic correlations between traits*

307 Spring traits of budburst (bb2) and leaf out (bb5) displayed highly positive genetic  
 308 correlations ( $R = 0.77$ ), but showed little to no link to autumn phenology  
 309 characteristics (Table 1). Similarly, autumn traits were strongly correlated indicating  
 310 strong alignment in the genetic basis of traits within either spring or autumn seasons  
 311 but not between. Leaf colouration was highly correlated with leaf senescence ( $R =$   
 312  $0.80-0.87$ ) suggesting a developmental cascade brought on by pleiotropic effects of  
 313 genes involved in sensing and responding to the end of favourable growing  
 314 conditions. Spring phenology was negatively correlated with both canopy duration  
 315 and lifetime growth, where clones bursting leaves early in the season hold their leaf  
 316 canopy longer and grow more. Leaf colouring was positively correlated with growth  
 317 reflecting that clones with late onset of leaf colouration and senescence conferred  
 318 higher lifetime growth (Table 1).

319

320

## 321 DISCUSSION

322

323 The ability of plants to survive the novel environmental conditions brought on by  
 324 climate change is dependent on populations harbouring sufficient genetic variation to  
 325 adapt to changes in seasonality. Here, we show that timing of phenology in an  
 326 experimental population of *P. trichocarpa* has a heritable genetic basis, but also that

these traits can vary between years in response to climatic variation. With heritable genetic variation underlying both spring and autumn phenology, and an absence of genetic constraint between these transitions, our results suggest that these traits have potential to evolve independently in order to track future climate changes. As projections suggest climate change may provide conditions for a longer growing season, the absence of constraint may allow trees to have a longer canopy duration, which will in turn lead to higher growth. Together these findings provide insight into the genetic architecture of phenology traits, and identify the capacity of *P. trichocarpa* to adapt its phenology to novel environmental contexts as they colonise areas outside their original range, or as environmental conditions shift via global climate change.

There is a considerable contribution of genetics to all phenology traits surveyed in this field experiment and similar to other studies (eg. OLSON *et al.* 2013) we find abundant genetic variation for phenology traits determining the length of the growing season. There was also a strong genetic correlation within spring and within autumn phenology traits (0.77 - 0.87) suggesting pleiotropic effects of the genes underlying the cascade of leaf development and between traits influencing leaf coloration and leaf senescence, however genetic correlations across spring and autumn phenology were low to non-existent, reinforcing previous studies that show the genes (MCKOWN *et al.* 2014b) and environmental cues (SINGH *et al.* 2017) underlying spring and autumn phenology are different. Both spring phenology traits had negative correlations with lifetime growth suggesting that earlier budburst is beneficial for lifetime growth, and there was a stronger link between leaf unfurling and growth, suggesting clones with predictable late leaf unfurling was detrimental for lifetime growth.

Growing season in deciduous forest trees is defined by the leaf phenology traits, and we show with this experiment that canopy duration has a negative genetic correlation with spring phenology, and a positive correlation with autumn phenology. Perhaps unsurprisingly, we identify a genetic association where early bud burst and late leaf

drop leads to longer growing season and greater lifetime growth. These patterns have been shown in other studies of this species (eg. MCKOWN *et al.* 2014a), reflecting the general biology of adaptation in deciduous plants, where the timing of spring phenology resolves the tension between two factors: damage avoidance and competition. Early budburst increases the probability of leaf exposure to frost conditions, however it may confer a competitive advantage by earlier exposing leaves to (direct) sunlight. Late leaf flush delivers trees into an environment where much of the available light is already absorbed by early flushing neighbours, and puts the tree at a disadvantage for light capture that may last for the full growing season. This disadvantage likely accumulates across years as the late flushing individual falls further behind its faster growing neighbours. Late flush also reduces exposure to optimal spring growing conditions, further compounding the disadvantage of spring shading which may significantly reduce growth (YU *et al.* 2001).

A number of studies have found moderate heritability for phenology traits in this, and other *Populus* species for estimates of bud flush however, it is important to note that the majority of these studies have been conducted on juvenile trees (eg. MCKOWN *et al.* 2014a; PLIURA *et al.* 2014). Estimates of growth heritability presented here is generally higher than previously reported values for *P. trichocarpa* (MARRON *et al.* 2010; MCKOWN *et al.* 2014a), however this may be due to estimations being derived from established adult trees which will reduce the impact of random events which can lead to highly variable growth in the first few growing seasons. It is not uncommon to find higher heritability for fitness related traits in older individuals in animals and humans (eg. CHRISTENSEN *et al.* 2003; WILSON *et al.* 2005) however this is more likely to be due to a decline in environmental or residual variance, rather than an increase in additive genetic variance. Other considerations such as the pedigree structure and source material in this population may also contribute to the higher heritability estimates than other studies, and also contribute to the large credible intervals around these estimates. We emphasise that due to these factors, heritability estimates should be interpreted in the context of the present population and experimental design.

389

390 While we find evidence for a heritable basis to spring and autumn phenology, there is  
 391 only a weak relationship between leaf unfurling and senescence. This finding adds to  
 392 existing evidence that different genetic architectures are controlling phenological  
 393 responses of spring and autumn environmental cues in *P. trichocarpa*. This is  
 394 consistent with the observation of conserved patterns of environmental responses  
 395 across the plant kingdom where bud burst is largely regulated by local environment  
 396 not local adaptation (MACKENZIE *et al.* 2018) and leaf out highly dependent on  
 397 temperature (POLGAR AND PRIMACK 2011). Sensitivity to local growing conditions  
 398 such as temperature and altitude (a strong determinant of temperature) can be  
 399 stronger than population level patterns of local adaptation, and sensitivity can be  
 400 similar between populations of the same species (VITASSE *et al.* 2009), suggesting  
 401 that the timing of spring growth is mediated by plants anticipating favourable local  
 402 conditions which pose reduced risk of damage before investing resources in the  
 403 production of leaf tissue. The strong cross-year genetic correlations and high  
 404 heritability in these traits suggests that there is substantial variation in the timing of  
 405 seasonal transitions across years, but that clones respond in the same way over  
 406 consecutive years.

407

408 Variability and uncertainty in relation to the future timing of seasonal transitions and  
 409 the potential for extreme or unseasonal weather events such as out of season frost  
 410 pose a significant risk of damage to deciduous trees. Our findings here suggest that  
 411 adaptive shifts in phenology may be possible in *P. trichocarpa*, however the genetic  
 412 links between phenology and growth suggest that shifts in the timing of spring and  
 413 autumn transitions have the potential to affect growth if shifts lead to a shortening of  
 414 the growth period. Previous work has shown that autumn phenology is primarily  
 415 initiated as trees respond to predictable changes in photoperiod , but data presented  
 416 here suggests that large interannual shifts in autumn timing are possible, which  
 417 suggest that leaf colour and senescence traits may also be responding to multiple  
 418 environmental cues either during the summer growing season, or during the onset of  
 419 autumn (ROHDE *et al.* 2011b).

420

421 Multiple studies have shown that temperature is not a trigger for senescence  
 422 (BHALERAO *et al.* 2003; KESKITALO *et al.* 2005; LUQUEZ *et al.* 2008; FRACHEBOUD *et*  
 423 *al.* 2009), however speed of senescence is temperature dependent once initiated  
 424 (FRACHEBOUD *et al.* 2009) and evidence from poplar hybrids suggests that  
 425 temperature may contribute to the timing of growth cessation and bud set (ROHDE *et*  
 426 *al.* 2011a). In this study we were unable to accurately measure bud set across the  
 427 experiment, however it is clear that growth cessation occurs some time before bud  
 428 set and before leaves change colour (ROHDE *et al.* 2011b) which suggests that the  
 429 annual variation in colour timing is a response to differences in autumn temperature  
 430 between years that is occurring after the point where trees have initiated senescence.  
 431 The risks of autumn frost damage are elevated with late bud set, which can have  
 432 significant negative effects on viability and winter survival in juvenile trees (HOWE *et*  
 433 *al.* 2003), so it is likely that late season phenology is strongly associated with climatic  
 434 adaptation. In this case, photoperiod is a more reliable predictor of the onset of frost  
 435 than temperature, which fluctuates between seasons so it is likely that growth  
 436 cessation and bud set occurs before the prospect of frosts and trees are prepared for  
 437 winter long before the leaf colour changes (BASLER AND KÖRNER 2012).

438

439 It is important to note that a substantial shift in autumn phenology occurred between  
 440 the two years of observation. In 2018, there was a faster increase in temperature and  
 441 more sunny days during early spring, which is reflected in the faster spring  
 442 development and earlier leaf out in that year. Autumn was also drier, and leaf  
 443 colouration earlier in 2018, which is consistent with the presence of drought induced  
 444 bud set, so it is likely that although light characteristics are the primary cue for  
 445 growth cessation and senescence (MICHELSON *et al.* 2017; TRIOZZI *et al.* 2018), the  
 446 timing and response to these factors is modified by other environmental cues such as  
 447 temperature (ROHDE *et al.* 2011a) or drought stress (ADAMS *et al.* 2015). Importantly,  
 448 this finding suggests that although timing of phenology transitions have a strong  
 449 genetic basis, trees respond to multiple cues and may respond to variable local  
 450 climatic conditions as well as predictable cues such as day length. Adaptation may be



451 facilitated by the capacity to track both constant cues (such as daylength) and variable  
452 cues such as temperature and rainfall, which may facilitate establishment of new  
453 populations outside of their natural range, and allow adaptation to shifting conditions  
454 within the native distribution.

455

## 456 CAVEATS AND CONCLUSIONS

457 This study presents data from a collection of source genotypes sampled over  
458 approximately 15 degrees of latitude in north-western north America. This sampling  
459 design may inflate estimates of heritability by sampling across locally adapted  
460 populations, although this does not undermine the key findings that phenology  
461 transitions have a strong genetic basis. Also, we are unable to explore the contribution  
462 of dominance and epistatic interactions to our estimates of additive genetic variance  
463 due to limitations of the pedigree, however we note that these are common limitations  
464 of quantitative genetic analyses of experimental systems, and we acknowledge that  
465 some of the phenotypic variance attributed to additive genetic variation may be the  
466 result of dominance and epistatic interactions.

467 Overall, the substantial heritability found in phenology traits and the ability of trees to  
468 shift the timing of phenology transitions drastically between years suggests that *P.*  
469 *trichocarpa* populations have the ability to adjust their phenology in response to a  
470 changing climate. The wide and environmentally variable native range of *P.*  
471 *trichocarpa* is indicative of this species ability to persist across variable and  
472 unpredictable climates. We show here that a genetic variation underlies a large part  
473 of variation in phenology traits, but that trees also have the capacity for significant  
474 phenology shifts in response to year to year weather variation across the two years  
475 investigated here. This suggests this species has capacity to adapt its phenology to  
476 rapid climatic shifts, and that there is sufficient genetic variation underlying these  
477 traits that either natural or artificial selection could lead to evolutionary changes in  
478 adaptive phenology traits which may facilitate colonisation outside its natural range.

479

480



481 ACKNOWLEDGEMENTS: This project was funded by the Swedish Research  
482 Council FORMAS, as part of the Climate-Adapted Poplar (CLAP) project.

483

484 COMPETING INTERESTS: The authors declare no conflict of interest or competing  
485 interests.

486 DATA ARCHIVING: Data will be uploaded to the Swedish Artportalen

487 /Artdatabanken database, and any other archive suggested by Reviewers or editors

488 CITED LITERATURE

- 489 Adams, H. D., A. D. Collins, S. P. Briggs, M. Vennetier, L. T. Dickman *et al.*, 2015  
490 Experimental drought and heat can delay phenological development and  
491 reduce foliar and shoot growth in semiarid trees. *Global Change Biology*  
492 21: 4210-4220.
- 493 Basler, D., and C. Körner, 2012 Photoperiod sensitivity of bud burst in 14 temperate  
494 forest tree species. *Agricultural and Forest Meteorology* 165: 73-81.
- 495 Bhalerao, R., J. Keskitalo, F. Sterky, R. Erlandsson, H. Björkbacka *et al.*, 2003 Gene  
496 expression in autumn leaves. *Plant Physiology* 131: 430-442.
- 497 Bradshaw, H., and R. F. Stettler, 1995 Molecular genetics of growth and development  
498 in populus. IV. Mapping QTLs with large effects on growth, form, and  
499 phenology traits in a forest tree. *Genetics* 139: 963-973.
- 500 Breilsford, C. C., L. Nybakken, T. K. Kotilainen and T. M. Robson, 2019 The  
501 influence of spectral composition on spring and autumn phenology in  
502 trees. *Tree physiology* 39: 925-950.
- 503 Christensen, K., H. Frederiksen, J. W. Vaupel and M. McGue, 2003 Age trajectories  
504 of genetic variance in physical functioning: a longitudinal study of Danish  
505 twins aged 70 years and older. *Behavior genetics* 33: 125-136.
- 506 Chuine, I., 2010 Why does phenology drive species distribution? *Philosophical*  
507 *Transactions of the Royal Society B: Biological Sciences* 365: 3149-  
508 3160.
- 509 Cong, N., M. Shen and S. Piao, 2016 Spatial variations in responses of vegetation  
510 autumn phenology to climate change on the Tibetan Plateau. *Journal of*  
511 *Plant Ecology* 10: 744-752.
- 512 Costa e Silva, J., N. M. G. Borralho and B. M. Potts, 2004 Additive and non-additive  
513 genetic parameters from clonally replicated and seedling progenies of  
514 *Eucalyptus globulus*. *Theoretical and Applied Genetics* 108: 1113-1119.
- 515 Cronk, Q., 2005 Plant eco-devo: the potential of poplar as a model organism. *New*  
516 *Phytologist* 166: 39-48.

517 Evans, L. M., G. T. Slavov, E. Rodgers-Melnick, J. Martin, P. Ranjan *et al.*, 2014  
518 Population genomics of *Populus trichocarpa* identifies signatures of  
519 selection and adaptive trait associations. *Nature genetics* 46: 1089.

520 Fabbrini, F., M. Gaudet, C. Bastien, G. Zaina, A. Harfouche *et al.*, 2012 Phenotypic  
521 plasticity, QTL mapping and genomic characterization of bud set in black  
522 poplar. *BMC Plant Biology* 12: 47.

523 Fracheboud, Y., V. Luquez, L. Björkén, A. Sjödin, H. Tuominen *et al.*, 2009 The  
524 Control of Autumn Senescence in European Aspen. *Plant Physiology*  
525 149: 1982-1991.

526 Hadfield, J. D., 2010 MCMC methods for multi-response generalized linear mixed  
527 models: the MCMCglmm R package. *Journal of Statistical Software* 33:  
528 1-22.

529 Horvath, D. P., J. V. Anderson, W. S. Chao and M. E. Foley, 2003 Knowing when to  
530 grow: signals regulating bud dormancy. *Trends in Plant Science* 8: 534-  
531 540.

532 Howe, G. T., S. N. Aitken, D. B. Neale, K. D. Jermstad, N. C. Wheeler *et al.*, 2003  
533 From genotype to phenotype: unraveling the complexities of cold  
534 adaptation in forest trees. *Canadian Journal of Botany* 81: 1247-1266.

535 Howe, G. T., P. Saruul, J. Davis and T. H. H. Chen, 2000 Quantitative genetics of  
536 bud phenology, frost damage, and winter survival in an F2 family of  
537 hybrid poplars. *Theoretical and Applied Genetics* 101: 632-642.

538 Ingvarsson, P. K., M. V. Garcia, V. Luquez, D. Hall and S. Jansson, 2008 Nucleotide  
539 Polymorphism and Phenotypic Associations Within and Around the  
540 phytochrome B2 Locus in European Aspen (*Populus tremula*, Salicaceae).  
541 *Genetics* 178: 2217.

542 Jansson, S., and C. J. Douglas, 2007 *Populus*: A Model System for Plant Biology.  
543 *Annual Review of Plant Biology* 58: 435-458.

544 Karacic, A., T. Verwijst and M. Weih, 2003 Above-ground Woody Biomass  
545 Production of Short-rotation *Populus* Plantations on Agricultural Land in  
546 Sweden. *Scandinavian Journal of Forest Research* 18: 427-437.

547 Kennedy, B. W., and L. R. Schaeffer, 1989 Genetic evaluation under an animal  
548 model when identical genotypes are represented in the population. *Journal*  
549 *of Animal Science* 67: 1946-1955.

550 Keskitalo, J., G. Bergquist, P. Gardeström and S. Jansson, 2005 A cellular timetable  
551 of autumn senescence. *Plant Physiology* 139: 1635-1648.

552 Lagercrantz, U., 2009 At the end of the day: a common molecular mechanism for  
553 photoperiod responses in plants? *Journal of experimental botany* 60:  
554 2501-2515.

555 Leuchner, M., A. Menzel and H. Werner, 2007 Quantifying the relationship between  
556 light quality and light availability at different phenological stages within a  
557 mature mixed forest. *Agricultural and forest meteorology* 142: 35-44.

558 Luquez, V., D. Hall, B. R. Albrechtsen, J. Karlsson, P. Ingvarsson *et al.*, 2008 Natural  
559 phenological variation in aspen (*Populus tremula*): the SwAsp collection.  
560 *Tree Genetics & Genomes* 4: 279-292.

561 MacKenzie, C. M., R. B. Primack and A. J. Miller-Rushing, 2018 Local environment,  
562 not local adaptation, drives leaf-out phenology in common gardens along  
563 an elevational gradient in Acadia National Park, Maine. *American Journal*  
564 *of Botany* 105: 986-995.

565 Marron, N., V. Storme, S. Y. Dillen, C. Bastien, L. Ricciotti *et al.*, 2010 Genomic  
566 regions involved in productivity of two interspecific poplar families in  
567 Europe. 2. Biomass production and its relationships with tree architecture  
568 and phenology. *Tree Genetics & Genomes* 6: 533-554.

569 McKown, A. D., R. D. Guy, J. Klápště, A. Geraldes, M. Friedmann *et al.*, 2014a  
570 Geographical and environmental gradients shape phenotypic trait  
571 variation and genetic structure in *Populus trichocarpa*. *New Phytologist*  
572 201: 1263-1276.

573 McKown, A. D., J. Klápště, R. D. Guy, Y. A. El-Kassaby and S. D. Mansfield, 2018  
574 Ecological genomics of variation in bud-break phenology and  
575 mechanisms of response to climate warming in *Populus trichocarpa*. *New*  
576 *Phytologist* 220: 300-316.

577 McKown, A. D., J. Klápště, R. D. Guy, A. Geraldes, I. Porth *et al.*, 2014b  
578 Genome-wide association implicates numerous genes underlying  
579 ecological trait variation in natural populations of *Populus trichocarpa*.  
580 *New Phytologist* 203: 535-553.

581 Michelson, I., H., K. Ingvarsson Pär, M. Robinson Kathryn, E. Edlund, E. Eriksson  
582 Maria *et al.*, 2017 Autumn senescence in aspen is not triggered by day  
583 length. *Physiologia Plantarum* 162: 123-134.

584 Olson, M., S., N. Levsen, Y. Soolanayakanahally Raju, D. Guy Robert, R. Schroeder  
585 William *et al.*, 2013 The adaptive potential of *Populus balsamifera* L. to  
586 phenology requirements in a warmer global climate. *Molecular Ecology*  
587 22: 1214-1230.

588 Pliura, A., V. Suchocka, D. Sarsekova and V. Gudynaitė, 2014 Genotypic variation  
589 and heritability of growth and adaptive traits, and adaptation of young  
590 poplar hybrids at northern margins of natural distribution of *Populus nigra*  
591 in Europe. *Biomass and Bioenergy* 70: 513-529.

592 Polgar, C. A., and R. B. Primack, 2011 Leaf-out phenology of temperate woody  
593 plants: from trees to ecosystems. *New Phytologist* 191: 926-941.

594 Porth, I., and Y. A. El-Kassaby, 2015 Using *Populus* as a lignocellulosic feedstock  
595 for bioethanol. *Biotechnology journal* 10: 510-524.

596 Porth, I., J. Klápště, A. D. McKown, J. La Mantia, R. D. Guy *et al.*, 2015  
597 Evolutionary Quantitative Genomics of *Populus trichocarpa*. *PLOS ONE*  
598 10: e0142864.

599 Porth, I., J. Klápště, A. D. McKown, J. La Mantia, R. C. Hamelin *et al.*, 2014  
600 Extensive Functional Pleiotropy of *REVOLUTA* Substantiated through  
601 Forward Genetics. *Plant Physiology* 164: 548-554.

602 Rohde, A., C. Bastien and W. Boerjan, 2011a Temperature signals contribute to the  
603 timing of photoperiodic growth cessation and bud set in poplar. *Tree*  
604 *physiology* 31: 472-482.

605 Rohde, A., V. Storme, V. Jorge, M. Gaudet, N. Vitacolonna *et al.*, 2011b Bud set in  
606 poplar – genetic dissection of a complex trait in natural and hybrid  
607 populations. *New Phytologist* 189: 106-121.

608 Sannigrahi, P., A. J. Ragauskas and G. A. Tuskan, 2010 Poplar as a feedstock for  
609 biofuels: a review of compositional characteristics. *Biofuels, Bioproducts*  
610 and *Biorefining* 4: 209-226.

611 Singh, R. K., T. Svystun, B. AlDahmash, A. M. Jönsson and R. P. Bhalerao, 2017  
612 Photoperiod- and temperature-mediated control of phenology in trees – a  
613 molecular perspective. *New Phytologist* 213: 511-524.

614 Slavov, G. T., and P. Zhelev, 2010 Salient biological features, systematics, and  
615 genetic variation of *Populus*, pp. 15-38 in *Genetics and genomics of*  
616 *Populus*. Springer.

617 Triozzi, P. M., J. M. Ramos-Sánchez, T. Hernández-Verdeja, A. Moreno-Cortés, I.  
618 Allona *et al.*, 2018 Photoperiodic Regulation of Shoot Apical Growth in  
619 Poplar. *Frontiers in plant science* 9: 1030-1030.

620 Vitasse, Y., S. Delzon, E. Dufrêne, J.-Y. Pontailier, J.-M. Louvet *et al.*, 2009 Leaf  
621 phenology sensitivity to temperature in European trees: Do within-species  
622 populations exhibit similar responses? *Agricultural and forest*  
623 *meteorology* 149: 735-744.

624 Walsh, B., and M. Lynch, 2018 *Evolution and selection of quantitative traits*. Oxford  
625 University Press.

626 Weih, M., 2004 Intensive short rotation forestry in boreal climates: present and future  
627 perspectives. *Canadian Journal of Forest Research* 34: 1369-1378.

628 Wilson, Alastair J., Loeske E. B. Kruuk and David W. Coltman, 2005 Ontogenetic  
629 Patterns in Heritable Variation for Body Size: Using Random Regression  
630 Models in a Wild Ungulate Population. *The American Naturalist* 166:  
631 E177-E192.

632 Yu, Q., P. Tigerstedt and M. Haapanen, 2001 Growth and phenology of hybrid aspen  
633 clones (*Populus tremula* L. x *Populus tremuloides* Michx.).

634 Zanewich, K. P., D. W. Pearce and S. B. Rood, 2018 Heterosis in poplar involves  
635 phenotypic stability: cottonwood hybrids outperform their parental  
636 species at suboptimal temperatures. *Tree Physiology* 38: 789-800.

637

638

## 639 FIGURE LEGENDS

640

641 **Figure 1:** Phenotypic trait summary in 2017 and 2018. Summaries shown are mean  
642 and density overlayed upon original data points. All phenology transitions occurred  
643 earlier in 2018 leading to a slightly longer mean growing season. Truncated  
644 distributions are indicative of an abrupt timepoint where all individuals reached  
645 maximum scores in each trait. Traits include beginning( bb2) and end (bb4) of  
646 budburst, beginning (col3) and end (col8) of leaf colour transition from green to  
647 yellow, leaf shed (ls3), canopy duration (CD), and lifetime growth (dbh).

648

649 **Figure 2:** Narrow sense heritability estimates for phenology traits at Krusenberg field  
650 experiment in 2017 and 2018. Means and 95% credible intervals derived from univariate  
651 ‘animal’ models run in R (MCMCglmm)

652

653

654 **Figure 3:** Cross year genetic correlations. Mean and 95% credible intervals for  
655 estimates of cross year genetic correlations. Traits include beginning and end of  
656 budburst (bb2, bb4), beginning and end of leaf colour transition from green to yellow  
657 (co3, co8), leaf shed (ls3), canopy duration (CD), Correlations between years is  
658 consistently high, and intervals overlap 1 for bb2, co3 and leaf shed traits.

659

660 **Figure S1:** Weather variation between the two years of survey. Spring temperatures  
661 increased faster, summer was warmer and wetter, and there were more sunny days  
662 during 2018. Historical range is indicated by black dots. Lines link monthly means  
663 for the study period.

664

665 **Figure S2:** Comparison of observed data (red) and Loess fit imputation (orange) for  
666 spring leaf development in four randomly selected individuals. Imputed data is fit  
667 through the first day individual trees were scored for each stage and show trajectories  
668 more in line with biological development. Intersection between dotted lines and fitted  
669 lines denotes values of bud break (BB2) and leaf unfurling (BB4).

670

671 **Table S1.** Crossing scheme showing origin (when known) of parents and number of  
 672 clones from each cross. Some of the parents (in bold) and all offspring clones are  
 673 included in the Krusenberg field experiment. OP indicates crosses that were  
 674 conducted with Open pollination. Numbers within table indicate how many offspring  
 675 were produced from each cross.  
 676



**Table 1:** Genetic correlation matrix of phenology and growth traits in *P. trichocarpa*. Correlation estimates were drawn from a 7 trait, multivariate ‘animal’ model using the MCMCGLMM procedure in R. Values in brackets represent the lower and upper 95% credible intervals, values in bold do not overlap zero. Traits include beginning and end of budburst (bb2, bb4), beginning and end of leaf colour transition from green to yellow (co3, co8), leaf shed (ls3), canopy duration (CD), and lifetime growth (DBH).

|     | bb2                                      | bb4                                      | co3                    | co8                    | ls3                                  | CD                                  |
|-----|------------------------------------------|------------------------------------------|------------------------|------------------------|--------------------------------------|-------------------------------------|
| bb4 | 0.768<br>(0.718,0.82)                    |                                          |                        |                        |                                      |                                     |
| co3 | 0.12<br>(-0.281,0.265)                   | 0.219<br>(-0.09,0.357)                   |                        |                        |                                      |                                     |
| co8 | 0.059<br>(-0.332,0.227)                  | 0.134<br>(-0.212,0.267)                  | 0.868<br>(0.828,0.866) |                        |                                      |                                     |
| ls3 | 0.211<br>(-0.074,0.349)                  | 0.255<br>(0.023,0.392)                   | 0.808<br>(0.752,0.821) | 0.8<br>(0.732,0.803)   |                                      |                                     |
| CD  | -0.668<br>(-1.591,-0.26)                 | <b>-0.427</b><br><b>(-1.127,-0.12)</b>   | 0.637<br>(0.56,0.718)  | 0.6<br>(0.492,0.655)   | <b>0.438</b><br><b>(0.276,0.527)</b> |                                     |
| DBH | <b>-0.317</b><br><b>(-0.809, -0.036)</b> | <b>-0.418</b><br><b>(-0.993, -0.115)</b> | 0.254<br>(0.009,0.394) | 0.394<br>(0.197,0.468) | 0.334<br>(0.181,0.456)               | <b>0.431</b><br><b>(0.25,0.506)</b> |

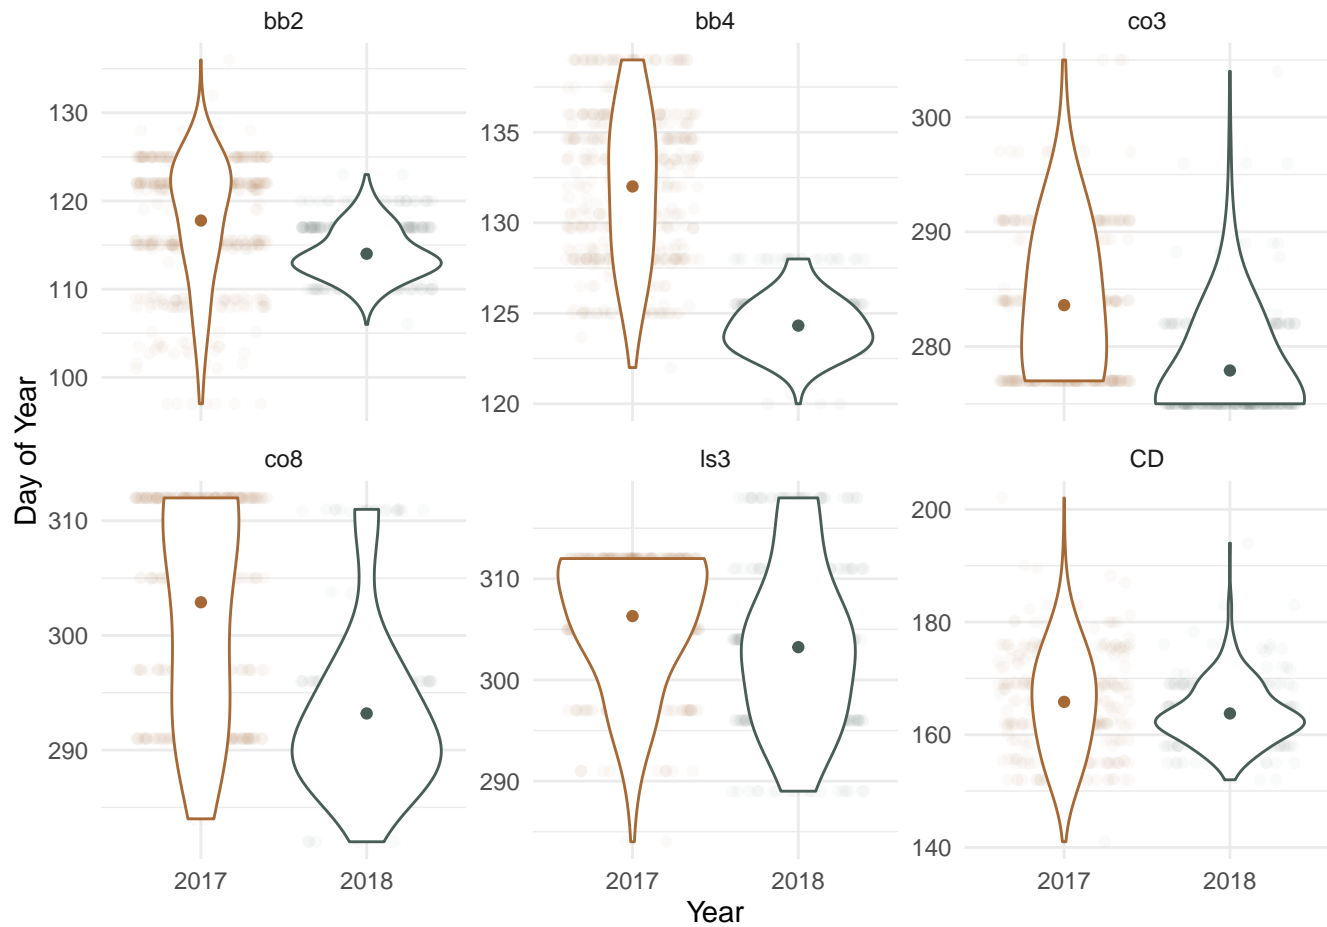

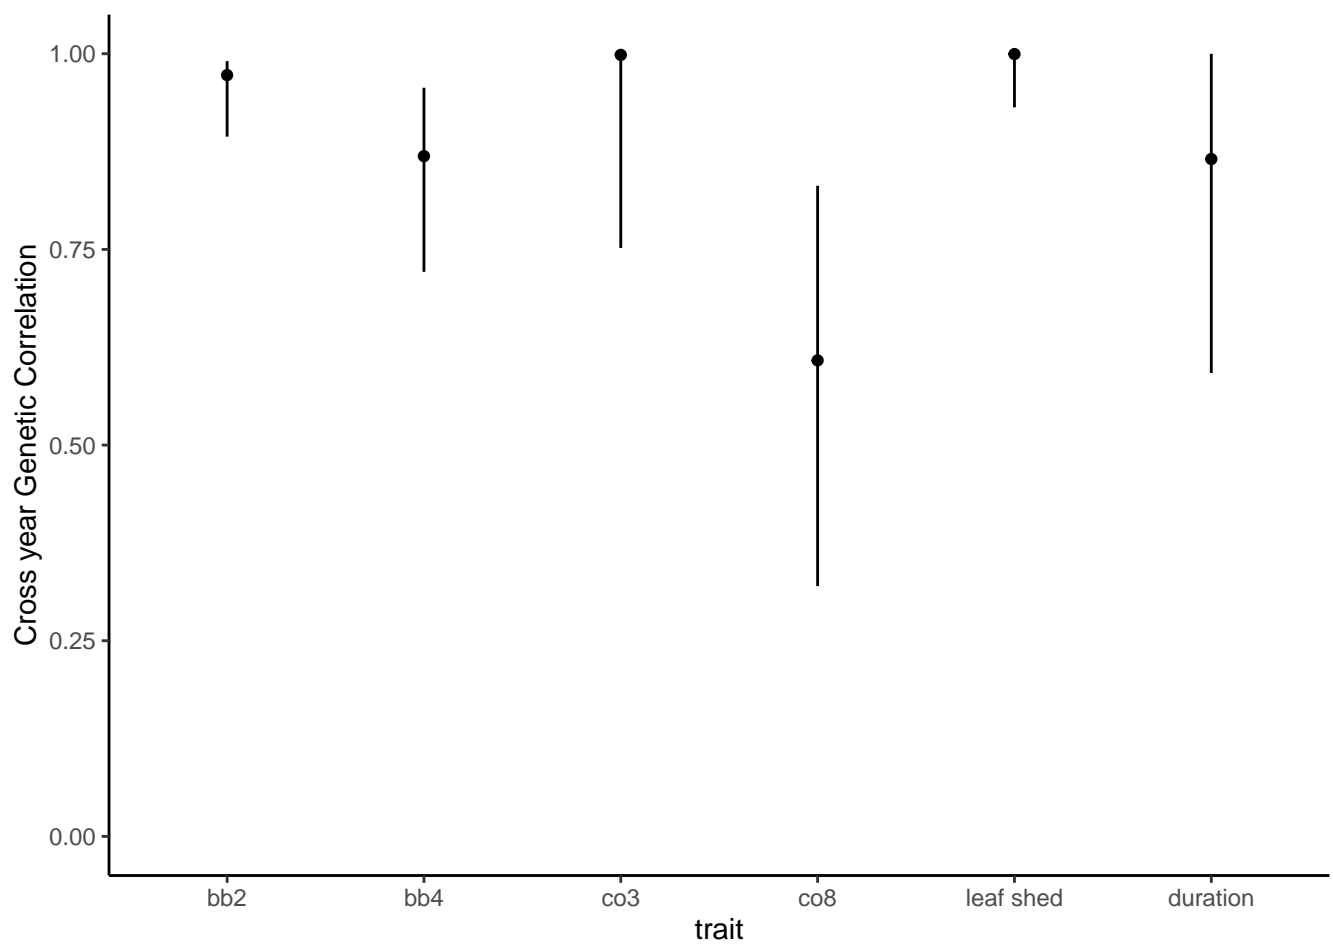

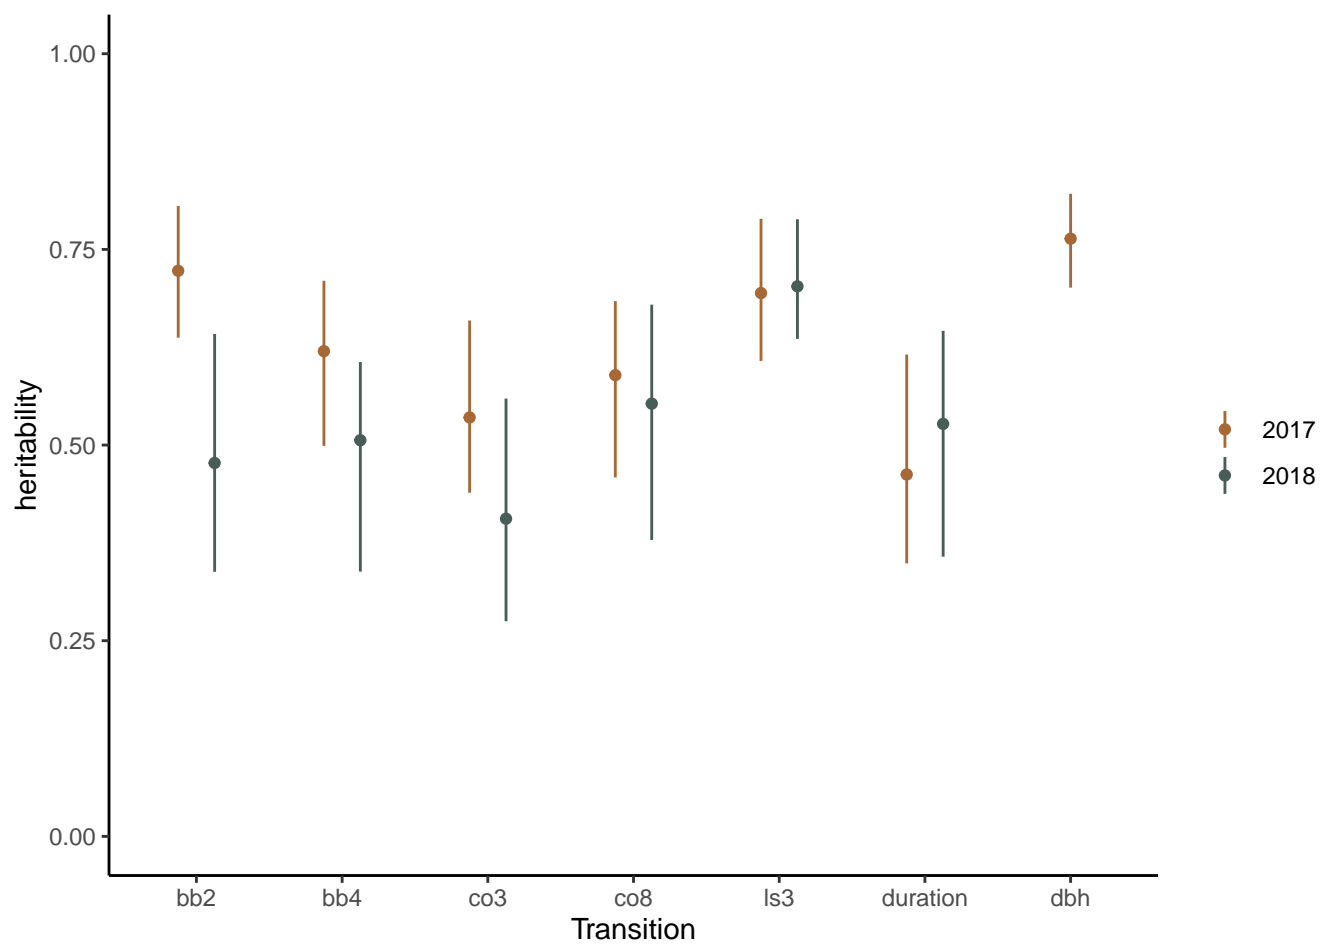

Source: https://www.biorxiv.org/content/10.1101/2020.06.12.148445v1.full.pdf
