# Supplementary material for: Quantitative genetic architecture of adaptive phenology traits in the deciduous tree, Populus trichocarpa (Torr. & Gray)
Source: bioRxiv or medRxiv preprint supplement (doi:10.1101/2020.06.12.148445), 2020-06-13
Supplement: Supplementary file [file media-1.pdf]

|                   |                 | Fathers |                |        |        |        |        |                        |             |                           |     |     |
|-------------------|-----------------|---------|----------------|--------|--------|--------|--------|------------------------|-------------|---------------------------|-----|-----|
|                   |                 | Region  | Alaska         |        | BC     | Idaho  | Oregon | Washington<br>x Oregon | Washington  | OP,<br>Koster,<br>Holland |     |     |
| Mothers           | Lat (alt.)      | Klon    | 58°30'<br>(15) | 60°00' | 49°15' | 48°25' | 45°35' |                        | 45°50' (75) |                           |     | -   |
| Region            | Lat (alt.)      | Klon    | 293            | 278    | 193    | 214    | 159    | 236                    | 299         | 187                       | 209 | 290 |
|                   | 58°30'          | 216     |                |        | 5      |        | 1      |                        | 5           |                           |     | 5   |
| Alaska            | 59°20'<br>(500) | 291     |                |        |        |        |        | 2                      |             | 1                         |     |     |
|                   | 60°37'<br>(400) | 265     | 3              | 3      |        | 1      |        |                        | 2           | 2                         |     |     |
| BC                | 49°00'          | 230     | 7              | 4      |        | 3      |        | 2                      | 6           |                           |     |     |
|                   | -               | 96      |                |        |        |        |        |                        | 1           |                           |     |     |
| Idaho x<br>Oregon | -               | 237     | 2              | 1      |        | 3      |        |                        | 3           | 1                         |     | 3   |
|                   | -               | 240     |                | 4      |        |        |        | 1                      | 21          |                           | 2   |     |
| Oregon            | 44°30'          | 271     | 1              | 2      |        |        |        | 1                      | 4           |                           |     | 1   |
| -                 |                 | 301     |                |        |        |        |        |                        |             | 2                         |     | 1   |
