# Supplementary material for: Quantitative genetic architecture of adaptive phenology traits in the deciduous tree, Populus trichocarpa (Torr. & Gray)
Source: bioRxiv or medRxiv preprint supplement (doi:10.1101/2020.06.12.148445), 2020-06-13

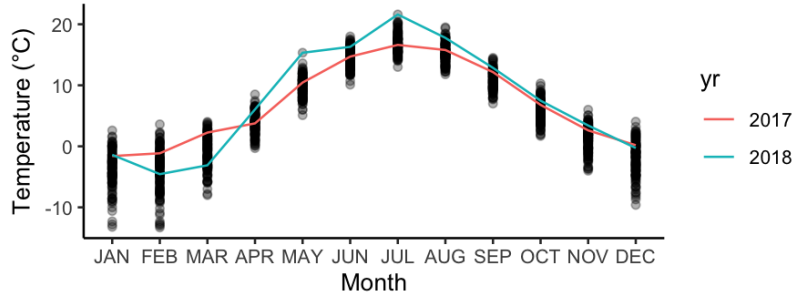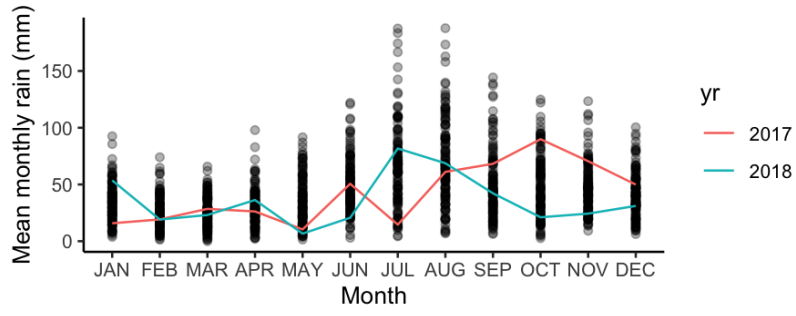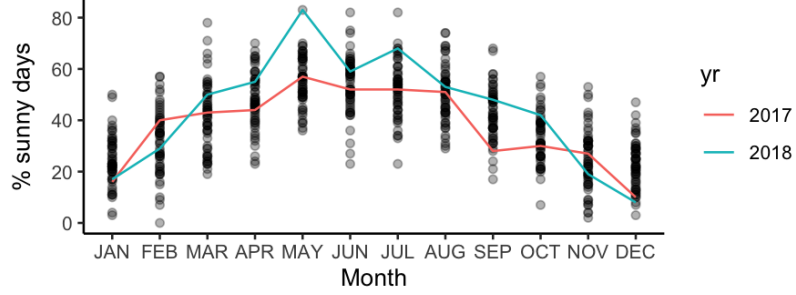

Supplement: Supplementary file [file media-3.pdf]
